# Supplementary material for: CircGPR137B/miR-4739/FTO feedback loop suppresses tumorigenesis and metastasis of hepatocellular carcinoma
Source: PubMed Central journal article supplement (PMC9297645; doi:10.1186/s12943-022-01619-4), 2022-07-20

FIG.S1

**Stage III**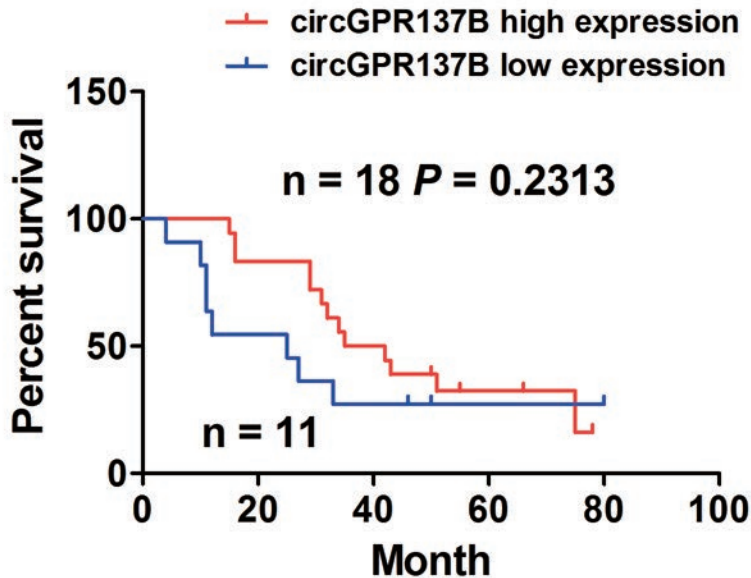

FIG.S2

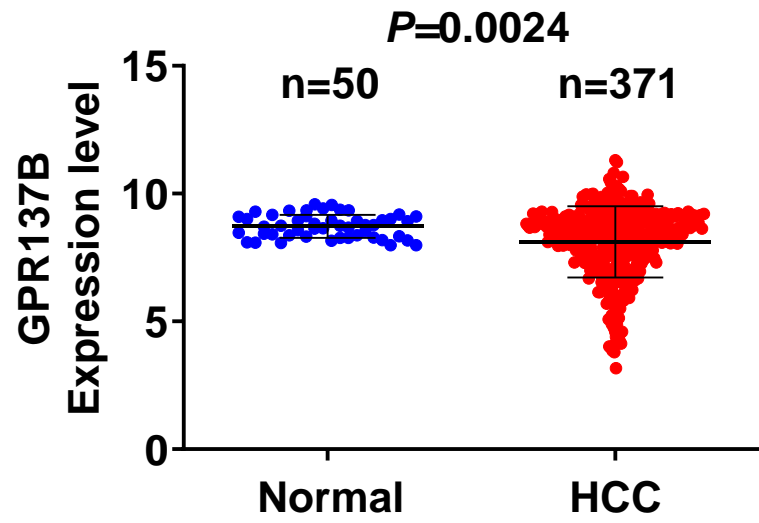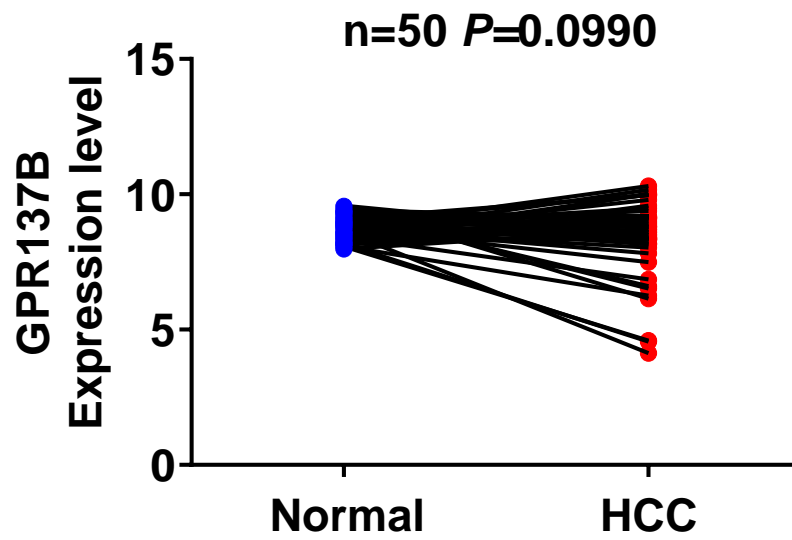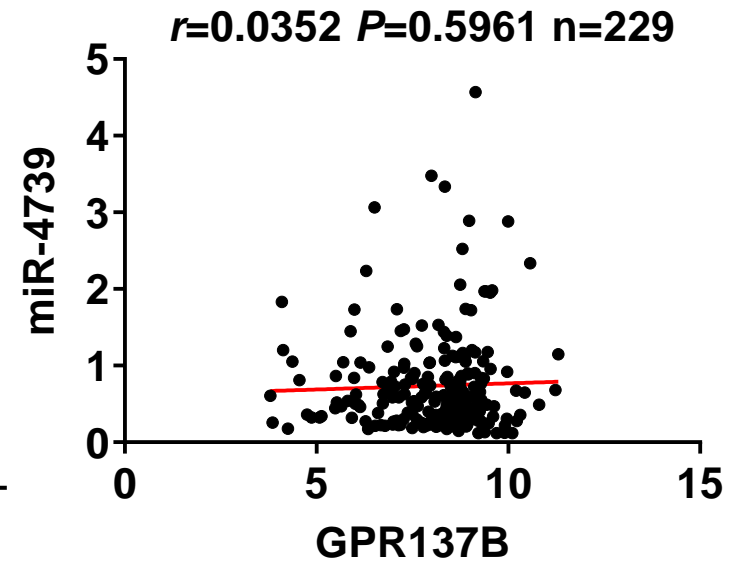

FIG.S3

**A**

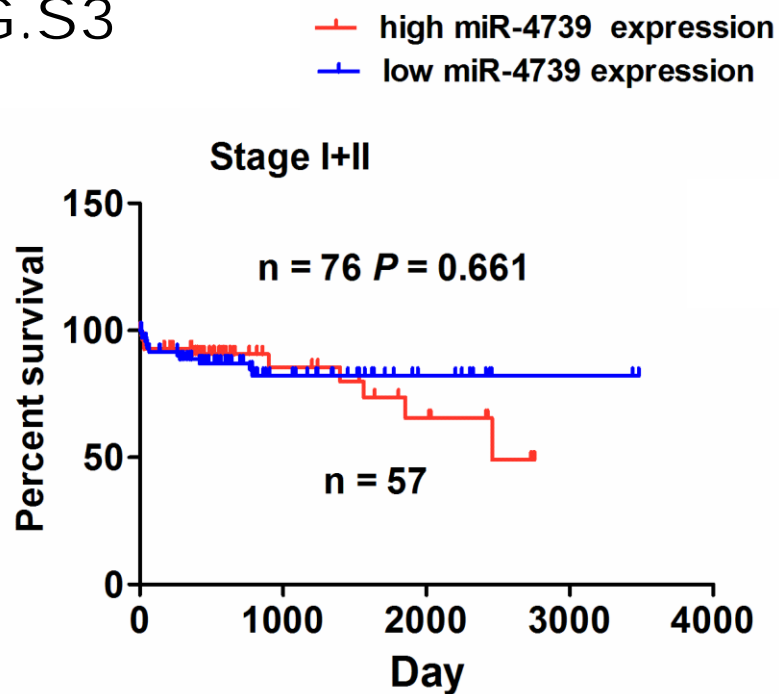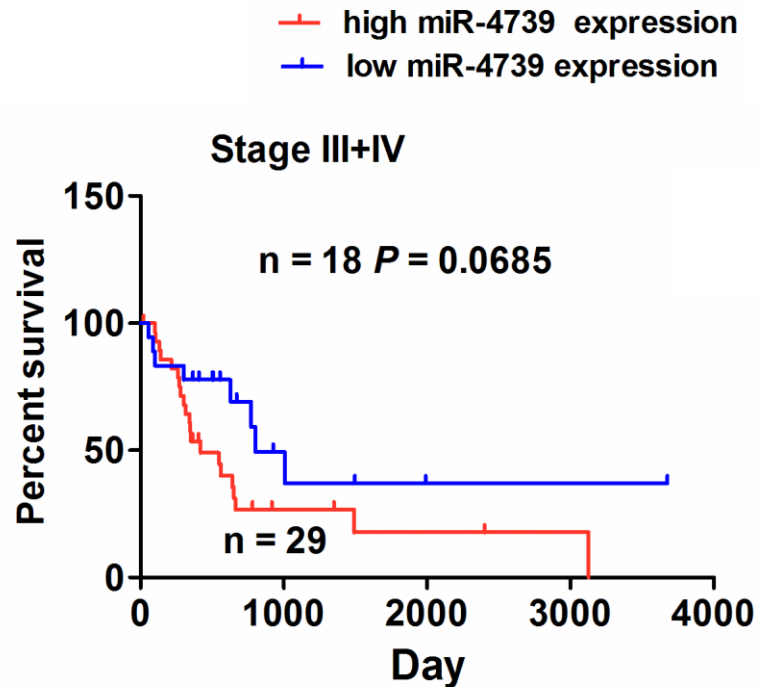

**B**

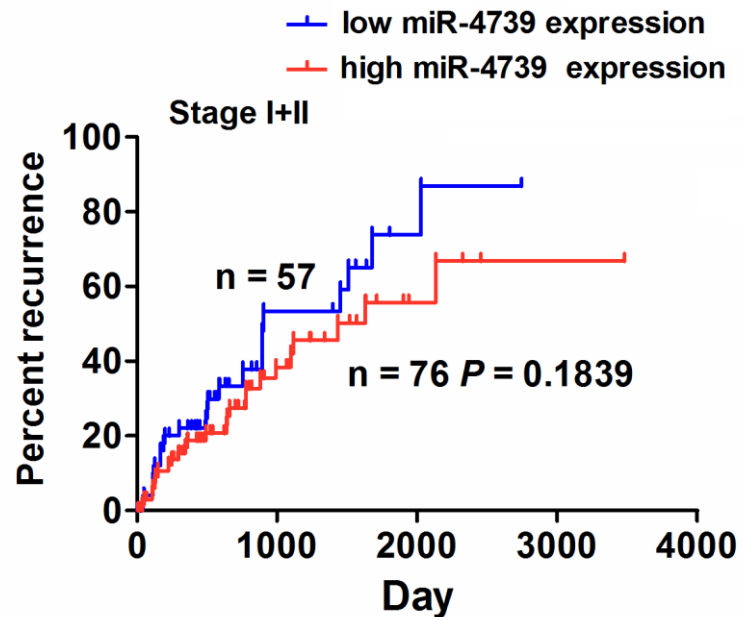

FIG.S4

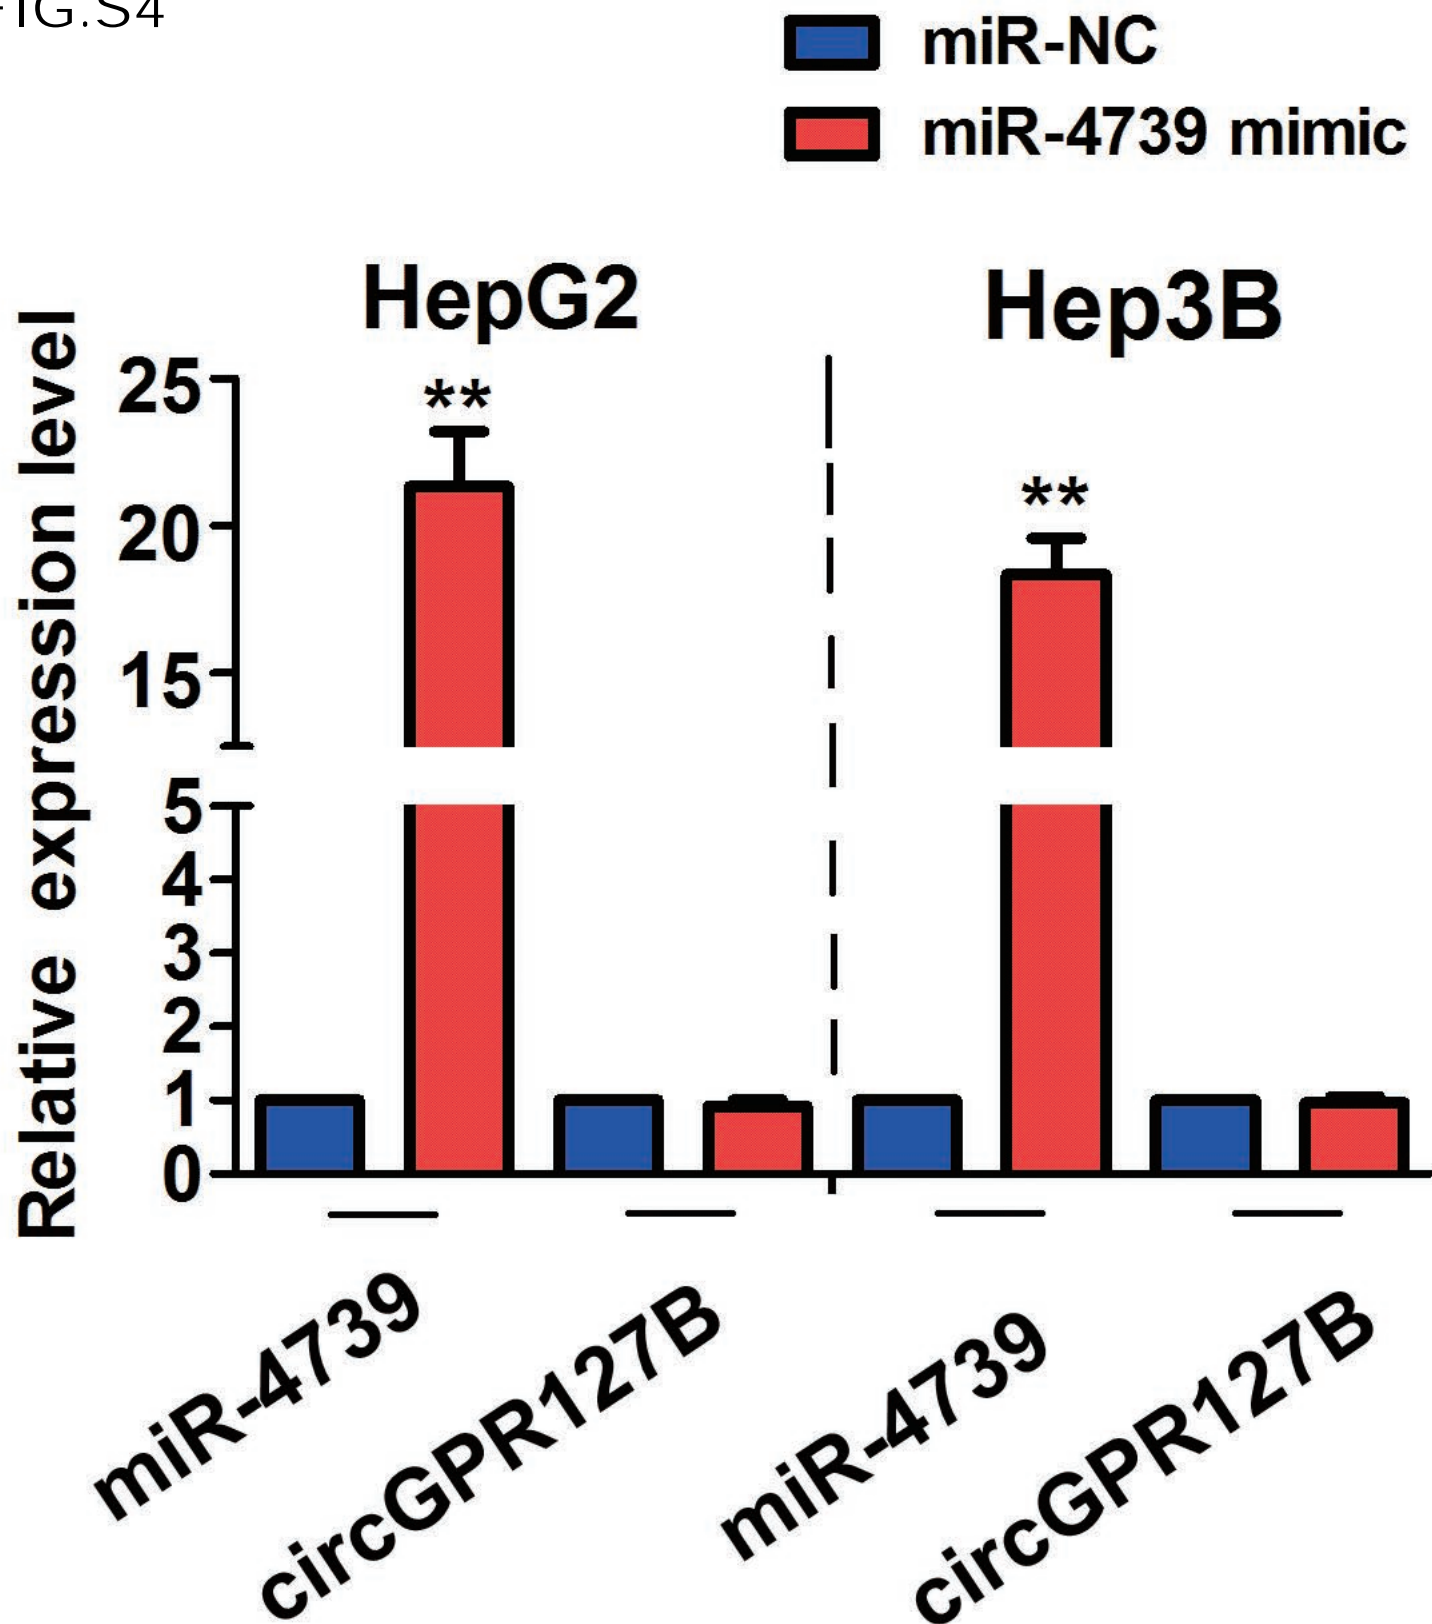

FIG.S5

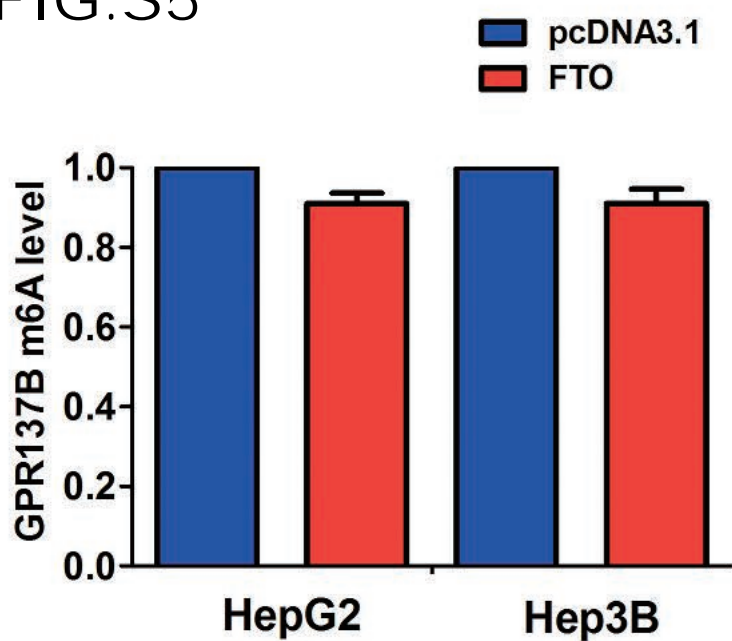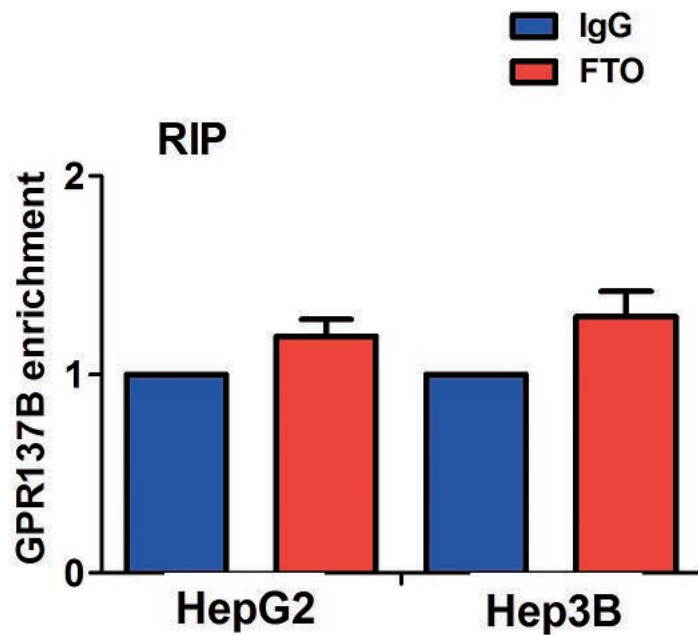

FIG.S6

**n = 3 P = 0.4489**

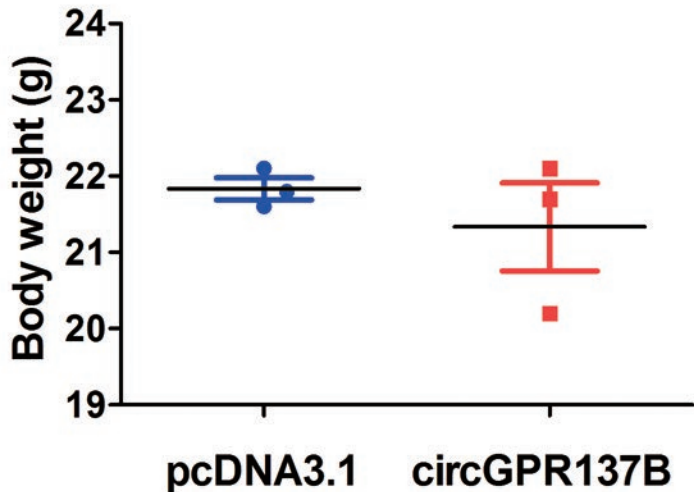

Supplement: 12943_2022_1619_MOESM1_ESM.pdf [file 12943_2022_1619_MOESM1_ESM.pdf]
