# Supplementary material for: CircGPR137B/miR-4739/FTO feedback loop suppresses tumorigenesis and metastasis of hepatocellular carcinoma
Source: PubMed Central journal article supplement (PMC9297645; doi:10.1186/s12943-022-01619-4), 2022-07-20
Supplement: 12943_2022_1619_MOESM2_ESM.pdf [file 12943_2022_1619_MOESM2_ESM.pdf]

## Supplementary figures

**Supplementary Figure S1.** Kaplan–Meier analysis of the association of circGRP137B high or low expression with overall survival in advanced stage cases.

**Supplementary Figure S2.** TCGA analysis of the expression levels of GPR137B and its correlation with miR-4739 expression in HCC tissue samples.

**Supplementary Figure S3.** Kaplan–Meier analysis of the association of miR-4739 high or low expression with **(A)** overall survival and **(B)** tumor recurrence in HCC and early/late stage cases.

**Supplementary Figure S4.** qPCR analysis of the effects of miR-4739 mimics on the expression of circGPR137B in HepG2 and Hep3B cell lines.

**Supplementary Figure S5.** MeRIP analysis of the effects of FTO on the m<sup>6</sup>A levels of GPR137B and RIP analysis of the binding between FTO and GPR137B in HepG2 and Hep3B cell lines.

**Supplementary Figure S6.** Comparison of the body weight between circGPR137B and control groups in liver tumor peritoneal metastasis models.

## Supplementary Tables

**Table S1** The primer sequences

| Gene name              | Primer sequence                                                    | Annealing temperature (°C) | Product length (bp) |
|------------------------|--------------------------------------------------------------------|----------------------------|---------------------|
| $\beta$ -actin (Human) | F:5' GTGGCCGAGGACTTTGATTG 3'<br>R:5' CCTGTAACAACGCATCTCATATT 3'    | 60                         | 73                  |
| circGPR137B            | F:5' 5'CGTGTGTCAAGTGACTGCCAT3'3'<br>R:5' ACTTGGCTTTGAAAATCACCTG 3' | 60                         | 161                 |
| miR-4739               | F: 5' AAGGGAGGAGGAGCGGAG 3'<br>R: 5'GTGCGTGTCTGGAGTCG 3'           | 60                         | 89                  |
| U6                     | F: GCTTCGGCAGCACATATACTAAAAT<br>R:5'CGCTTCACGAATTTGCGTGTTCAT3'     | 60                         | 63                  |
| FTO                    | F: 5' ACTTGGCTCCCTTATCTGACC 3'<br>R:5' TGTGCAGTGTGAGAAAGGCTT3'     | 60                         | 145                 |
| GPR137B                | F: 5' GGTAAGACGGGAAATTGGGAG 3'<br>R:5' AGCACGAAGAGCGTGTTCATTA3'    | 60                         | 75                  |

circGPR137B cDNA sequence (Red: primer location; Blue, m6A motif and the underlined A is the potential methylation location).

GTGATTTTCAAAGCCAAGTCAAATATTCTCCAGAATTACTCAAATACCGGTTGCCCTCTACCT  
GGCCTCCCTCTTCATCAGCCTTGTTTTCTGTTGGTGAATTTAACCTGTGCTGTGCTGGTAAAGAC  
GGGAAATTGGGAGAGGAAGGTTATCGTCTCTGTGCGAGTGGCCATTAATGACACGCTCTTCGTG  
CTGTGTGCCGTCTCTCTCCATCTGTCTCTACAAAATCTCTAAGATGTCCTTAGCCAACATTTAC  
TTGGAGTCCAAGGGCTCCTCCGTGTGTCAAGTGACTGCCATCGGTGTCACCGTGATACTGCTTT  
ACACCTCTCGGGCTGCTACAACCTGTTTCATCCTGTCAATTTCTCAGAACAAGAGCGTCCATTCC  
TTTGATTATGACTGGTACAATGTATCAGACCAGGCAGATTTGAAGAATCAGCTGGGAGATGCTG  
GATACGTATTATTTGGAGTGGTGTATTTGTTGGGAACTCTTACCTACCACCTTAGTCGTTTATTT  
CTTCCGAGTTAGAAATCCTACAAAGGACCTTACCAACCCTGGAATGGTCCCCAGCCATGGATTC  
AGTCCCAGATCTTATTTCTTTGACAACCCTCGAAGATATGACAGTGTGATGACCTTGCCTGGAA  
CATTGCCCTCAGGGACTTCAGGGAGTTTTGCTCCAGATTACTATGATTGGGGACAACAACT  
AACAGCTTCTGGCACAAGCAGGAAGTTGCAAGACTCAACTTTGGATCCTGACAAACCAAGCC  
TTGGGTAGCATCAGTTAACAGTTTTATGGACGATTCCTCAGATGAAAAGCTTCAGAAAAGCATA  
GTGACAGCTGAATTTTTAGGGCACTTTTCTTAAGAAATAGAAGTGGATTTTTATTTGTTACAGGT

TTCCAATGGCCCCATAGGAATAAGCAATAATGTAGACTGATAAACCCCTTATTTTAGTACTAAAGA  
GGGAGCCTTGCTATTTTCAGTGGGTATAATTTAACTTTTTAAAGAAAATCTGTACTTTTATAAAGA  
TGTATTTTGTATAACTTAAATAATAATGCTAAAGTATACTAGGGTTTTTTTTCTTGAGAATGTTAC  
TGCAATCATGTTGTAGTTTGCACAGACTTTTATGCATAATTCACCTTAAAAATATAGAATATATGG  
TCTAATAGTTTTTTAAAGCTTTTGGACTAAAGTATTCCACAAATCTTACCTCTTTAGGTCACTGAT  
GGTCACTCCGATTCTGAGTGCCACATTGGTAGACTCCTAAAATACAGTTGACAACCTTAGCCAATT  
GCAACTCCAGTGTTGATAATTTAAATGAAATGGTAAAGCAGCAGACTGTAAGGTCTTTAGAGAT  
TTTTTTTTAAGGTTTAGGCGTAGGTTCTCAAGGAATCTCTTAAGTTTTGCCCAAAGACTGGTA  
CTTCCTTTAGTAGGGCGCTAATGTATACACATTAATGATAAGTTGATAACATTAATAATGTAGC  
TGACTTATCCTATTAACCTCCTCTGCTATGTTACAGA

**Table S2** Correlation of circGPR137B expression with clinicopathological features of HCC patients

| parameters                       | Cases<br>(n) | circGPR137B<br>expression |              | <i>P</i> |
|----------------------------------|--------------|---------------------------|--------------|----------|
|                                  |              | Low<br>n=29               | High<br>n=58 |          |
| <b><i>Age</i></b>                |              |                           |              |          |
| ≥60                              | 21           | 8                         | 13           | 0.597    |
| <60                              | 66           | 21                        | 45           |          |
| <b><i>Gender</i></b>             |              |                           |              |          |
| Female                           | 9            | 2                         | 7            | 0.458    |
| Male                             | 78           | 27                        | 51           |          |
| <b><i>Tumor size (cm)</i></b>    |              |                           |              |          |
| <3.5                             | 18           | 7                         | 11           | 0.577    |
| ≥3.5                             | 69           | 22                        | 47           |          |
| <b><i>Pathological stage</i></b> |              |                           |              |          |
| I+II                             | 58           | 18                        | 40           | 0.522    |
| III                              | 29           | 11                        | 18           |          |
| <b><i>With cirrhosis</i></b>     |              |                           |              |          |
| Yes                              | 31           | 8                         | 23           | 0.271    |
| No                               | 56           | 21                        | 35           |          |
| <b><i>TNM staging</i></b>        |              |                           |              |          |
| 1+2                              | 46           | 13                        | 33           | 0.291    |
| 3+4                              | 41           | 16                        | 25           |          |

**Table S3** Univariate and multivariate Cox regression analysis of the association of circGPR137B with poor survival in HCC patients

| Parameter                               | Univariate | Multivariate analysis |       |             |
|-----------------------------------------|------------|-----------------------|-------|-------------|
|                                         | <i>P</i>   | <i>P</i>              | HR    | 95%CI       |
| Age ( $\geq 60$ vs. $< 60$ years)       | 0.522      | NA                    |       |             |
| Gender (Male vs. Female)                | 0.491      | NA                    |       |             |
| Tumor size ( $\geq 3.5$ vs. $< 3.5$ cm) | 0.135      | NA                    |       |             |
| With cirrhosis (Yes vs. No)             | 0.969      | NA                    |       |             |
| Pathological staging (III vs. I/II)     | 0.283      | NA                    |       |             |
| TNM staging (3/4 vs. 1/2)               | 0.006      | 0.011                 | 2.053 | 1.183-3.565 |
| circGPR137B expression (High vs. low)   | 0.008      | 0.015                 | 0.506 | 0.292-0.878 |

NA: not analyzed

**Table S4** The correlation of miR-4739 expression with clinicopathologic characteristics of HCC patients

| Variables                 | Cases<br>(n) | miR-4739 |     | <i>P</i> value |
|---------------------------|--------------|----------|-----|----------------|
|                           |              | High     | Low |                |
| Total                     | 180          | 86       | 94  |                |
| <i>Age (years)</i>        |              |          |     |                |
| ≥60                       | 91           | 46       | 45  | 0.460          |
| <60                       | 89           | 40       | 49  |                |
| <i>Gender</i>             |              |          |     |                |
| Male                      | 125          | 56       | 69  | 0.259          |
| Female                    | 55           | 30       | 25  |                |
| <i>Pathological stage</i> |              |          |     |                |
| I / II                    | 133          | 57       | 76  | 0.029          |
| III/IV                    | 47           | 29       | 18  |                |
| <i>T stage</i>            |              |          |     |                |
| T1/T2                     | 134          | 57       | 77  | 0.018          |
| T3/T4                     | 46           | 29       | 17  |                |
| <i>N stage</i>            |              |          |     |                |
| Negative                  | 133          | 64       | 69  | 1.000          |
| Positive                  | 47           | 22       | 25  |                |
| <i>M stage</i>            |              |          |     |                |
| Negative                  | 144          | 70       | 74  | 0.711          |
| Positive                  | 36           | 16       | 20  |                |

**Table S5** Cox regression analysis of miR-4739 expression as survival predictor

| Variables                  | Univariate Cox regression analysis |         | Multivariate Cox regression analysis |         |
|----------------------------|------------------------------------|---------|--------------------------------------|---------|
|                            | RR (95% CI)                        | P value | RR (95% CI)                          | P value |
| <i>Age (years)</i>         |                                    |         |                                      |         |
| <60 vs. ≥60                | 1.671 (0.943 to 2.962)             | 0.079   | NA                                   | NA      |
| <i>Gender</i>              |                                    |         |                                      |         |
| Male vs. Female            | 0.718 (0.406 to 1.270)             | 0.255   | NA                                   | NA      |
| <i>Pathological stage</i>  |                                    |         |                                      |         |
| III/IV vs. I / II          | 4.596 (2.605 to 8.108)             | <0.0001 | 6.009 (0.783 to 46.135)              | 0.085   |
| <i>T stage</i>             |                                    |         |                                      |         |
| T3+T4 vs. T1+T2            | 4.430 (2.517 to 7.795)             | <0.0001 | 0.707 (0.091 to 5.468)               | 0.740   |
| <i>N staging</i>           |                                    |         |                                      |         |
| Positive vs. Negative      | 0.912 (0.453 to 1.836)             | 0.797   | NA                                   | NA      |
| <i>M stage</i>             |                                    |         |                                      |         |
| Positive vs. Negative      | 0.765 (0.342 to 1.709)             | 0.513   | NA                                   | NA      |
| <i>miR-4739 expression</i> |                                    |         |                                      |         |
| High VS. Low               | 1.973 (1.111 to 3.503)             | 0.020   | 1.661 (0.921 to 2.997)               | 0.092   |

NA: not analyzed

**Table S6** Cox regression analysis of miR-4739 expression as recurrence predictor

| Variables                  | Univariate Cox regression analysis |         | Multivariate Cox regression analysis |         |
|----------------------------|------------------------------------|---------|--------------------------------------|---------|
|                            | RR (95% CI)                        | P value | RR (95% CI)                          | P value |
| <i>Age (years)</i>         |                                    |         |                                      |         |
| <60 vs. ≥60                | 1.098 (0.703 to 1.715)             | 0.681   | NA                                   | NA      |
| <i>Gender</i>              |                                    |         |                                      |         |
| Male vs. Female            | 1.014 (0.629 to 1.635)             | 0.954   | NA                                   | NA      |
| <i>Pathological stage</i>  |                                    |         |                                      |         |
| III/IV vs. I / II          | 2.777 (1.743 to 4.425)             | <0.0001 | 6.827 (0.909 to 51.261)              | 0.062   |
| <i>T stage</i>             |                                    |         |                                      |         |
| T3+T4 vs. T1+T2            | 2.684 (1.681 to 4.286)             | <0.0001 | 0.380 (0.050 to 2.884)               | 0.349   |
| <i>N staging</i>           |                                    |         |                                      |         |
| Positive vs. Negative      | 0.661 (0.370 to 1.183)             | 0.163   | NA                                   | NA      |
| <i>M stage</i>             |                                    |         |                                      |         |
| Positive vs. Negative      | 0.785 (0.432 to 1.426)             | 0.426   | NA                                   | NA      |
| <i>miR-4739 expression</i> |                                    |         |                                      |         |
| High VS. Low               | 1.919 (1.222 to 3.015)             | 0.005   | 1.841 (1.164 to 2.910)               | 0.009   |

NA: not analyzed

**Table S7** RNA-binding protein Ago2 sites matching flanking regions of circGPR137B

| <b>circRNA</b>   | <b>Tag Name</b>                     | <b>% Identity</b> | <b>Alignment Length</b> | <b>Tag Start</b> | <b>Tag End</b> | <b>circRNA Start</b> | <b>circRNA ENd</b> |
|------------------|-------------------------------------|-------------------|-------------------------|------------------|----------------|----------------------|--------------------|
| hsa_circ_0017114 | HPSD1_503_G666.1_23<br>6373055_30   | 100.00            | 30                      | 1                | 30             | +829                 | +858               |
| hsa_circ_0017114 | HPSEF_1262_G1500.1_<br>236373120_32 | 100.00            | 32                      | 1                | 32             | +901                 | +932               |
| hsa_circ_0017114 | HPSLC_1024_G1227.1_<br>236372244_29 | 100.00            | 29                      | 1                | 29             | +32                  | +60                |
| hsa_circ_0017114 | HPSLC_1025_G1228.1_<br>236372345_32 | 100.00            | 32                      | 1                | 32             | +122                 | +153               |
| hsa_circ_0017114 | HPSLC_1026_G1229.1_<br>236373055_30 | 100.00            | 30                      | 1                | 30             | +829                 | +858               |

**Table S8** The correlation of FTO expression with clinicopathologic characteristics of HCC patients

| Variables                 | Cases<br>(n) | FTO  |     | <i>P</i> value |
|---------------------------|--------------|------|-----|----------------|
|                           |              | High | Low |                |
| Total                     | 338          | 255  | 83  |                |
| <i>Age (years)</i>        |              |      |     |                |
| ≥60                       | 181          | 145  | 36  | 0.042*         |
| <60                       | 157          | 110  | 47  |                |
| <i>Gender</i>             |              |      |     |                |
| Male                      | 231          | 174  | 57  | 1.000          |
| Female                    | 107          | 81   | 26  |                |
| <i>Pathological stage</i> |              |      |     |                |
| I / II                    | 251          | 193  | 58  | 0.313          |
| III/IV                    | 87           | 62   | 25  |                |
| <i>T stage</i>            |              |      |     |                |
| T1/T2                     | 254          | 196  | 58  | 0.242          |
| T3/T4                     | 84           | 59   | 25  |                |
| <i>N stage</i>            |              |      |     |                |
| Negative                  | 248          | 182  | 66  | 0.156          |
| Positive                  | 90           | 73   | 17  |                |
| <i>M stage</i>            |              |      |     |                |
| Negative                  | 258          | 188  | 70  | 0.054          |
| Positive                  | 80           | 67   | 13  |                |



**Table S9** Cox regression analysis of FTO expression as survival predictor

| Variables                 | Univariate Cox regression analysis |         | Multivariate Cox regression analysis |         |
|---------------------------|------------------------------------|---------|--------------------------------------|---------|
|                           | RR (95% CI)                        | P value | RR (95% CI)                          | P value |
| <i>Age (years)</i>        |                                    |         |                                      |         |
| <60 vs. ≥60               | 1.292 (0.893 to 1.870)             | 0.173   | NA                                   | NA      |
| <i>Gender</i>             |                                    |         |                                      |         |
| Male vs. Female           | 0.781 (0.537 to 1.134)             | 0.194   | NA                                   | NA      |
| <i>Pathological stage</i> |                                    |         |                                      |         |
| III/IV vs. I /II          | 2.420 (1.671 to 3.503)             | <0.001  | 2.050 (0.280 to 14.988)              | 0.479   |
| <i>T stage</i>            |                                    |         |                                      |         |
| T3+T4 vs. T1+T2           | 2.440 (1.683 to 3.538)             | <0.001  | 1.234 (0.168 to 9.067)               | 0.837   |
| <i>N staging</i>          |                                    |         |                                      |         |
| Positive vs. Negative     | 1.407 (0.936 to 2.115)             | 0.101   | NA                                   | NA      |
| <i>M stage</i>            |                                    |         |                                      |         |
| Positive vs. Negative     | 1.598 (1.062 to 2.464)             | 0.024   | 1.277 (0.728 to 2.240)               | 0.395   |
| <i>FTO expression</i>     |                                    |         |                                      |         |
| High VS. Low              | 0.624 (0.423 to 0.921)             | 0.018   | 0.602 (0.405 to 0.894)               | 0.012   |

NA: not analyzed
